# Supplementary material for: Design of novel cyanovirin-N variants by modulation of binding dynamics through distal mutations
Source: eLife. 2022 Dec 6;11:e67474. doi: 10.7554/eLife.67474 (PMC9725752; doi:10.7554/eLife.67474)
Supplement: Supplementary file 1. [file elife-67474-supp1.xlsx]

## Sheet: TEM-1 ICDC
			Dynamically Coupled to Binding Sites										Not Dynamically Coupled to Binding Sites
			1										0
	Coevolved with Binding Sites	1	Residue	DFI Score	DCI Score	Distance		RAPTORX Score	MISTIC Score	EVCOUPLING Score	Current Amino acid	Available Amino acid	Residue	DFI Score	DCI Score	Distance		RAPTORX Score	MISTIC Score	EVCOUPLING Score	Current Amino acid	Available Amino acid
						Minimum	Average									Minimum	Average
			44	0.2	0.94	14	19	0.92	0.87	0.32	V	AFILMV	51	0.56	0.35	17	24	0.77	0.77	0.92	L	ACEFGIKLMNPQRSTV
			45	0.1	0.89	15	19	0.93	0.99	0.67	G	AGR	121	0.55	0.63	13	17	0.66	0.91	0.91	E	ADEGHKMNQRSTV
			46	0.05	0.86	15	19	0.9	0.88	0.69	Y	AFGILMTVY	142	0.35	0.52	13	19	0.83	0.61	0.77	I	ACFHILMNQRSTVY
			47	0.13	0.85	16	20	0.89	0.84	0.97	I	ACDEFGHILMNQRSTVWY	148	0.3	0.68	11	16	0.94	0.78	0.95	L	ADFILMQTVWY
			122	0.15	0.92	10	14	0.71	0.92	0.86	L	ACFHILMSV	155	0.58	0.51	17	23	0.68	0.91	0.91	M	ACEFGHIKLMNPQRSTVW
			137	0.13	0.93	10	15	0.93	0.95	0.95	L	AEFGIKLMQRSVY	183	0.04	0.5	14	17	0.84	0.97	0.75	P	ALPS
			179	0.25	0.85	11	13	0.98	0.97	0.93	D	ADGNR	199	0.61	0.45	17	23	0.74	0.99	0.67	L	ILV
			181	0.19	0.9	12	15	0.92	0.99	0.71	T	ACILSTV	220	0.49	0.67	10	16	0.95	0.96	0.99	L	ACEFGHKLMQRSTVWY
			182	0.1	0.7	15	18	0.66	0.98	0.65	M	ACKMNRSTV	222	0.61	0.56	11	18	0.93	0.99	0.74	R	ACGKLNPQRSV
			187	0.08	0.73	13	17	0.84	0.91	0.99	A	ACEGILMNQRSTV	223	0.71	0.51	14	20	0.88	0.88	0.64	S	ADEGHKLPQRSTV
			190	0.19	0.78	12	16	0.95	0.94	0.86	L	AFHILMNSTVWY	224	0.69	0.59	16	22	0.83	0.68	0.75	A	ADEGHIKLNPRSTVY
			262	0.01	0.94	10	15	0.96	0.64	0.99	V	ACGILNSTV	225	0.74	0.45	15	22	0.84	0.76	0.99	L	AFIKLMQSTVW
			263	0.01	0.9	11	15	0.94	0.8	0.99	I	ACFGILMSTV	227	0.98	0.67	20	27	0.66	0.62	0.89	A	ADEFGHIKLMNPQRSTV
	Not Coevolved with Binding Sites	0	83	0.74	0.89	16	22	0.16	0.41	0.44	R	ADEGHKLMNQRSTVY	35	0.8	0.81	21	27	0.52	0.09	0.53	D	ADEGHIKLMNPQRSTVWY
			84	0.77	0.84	17	23	0.33	0.41	0.48	V	ACDEFGHIKLMNQRSTVWY	52	0.75	0.28	21	27	0.44	0.49	0.5	N	ADEFGHIKMNPQRSTV
			93	0.92	0.92	19	24	0.16	0.35	0.51	R	ADEHKLNQRSTVY	197	0.71	0.42	21	26	0.33	0.39	0.49	E	ACDEGHKLNPQRSTY
			94	0.9	0.93	19	23	0.16	0.29	0.4	R	ACDEFGHIKLMNPQRSTVW	201	0.79	0.43	20	25	0.33	0.09	0.32	L	ACDEFGHIKLMNPQRSTVY
													289	0.85	0.72	23	30	0.52	0.1	0.5	H	ACDEFGHIKLMNPQRSTVWY
