# Supplementary material for: Design of novel cyanovirin-N variants by modulation of binding dynamics through distal mutations
Source: eLife. 2022 Dec 6;11:e67474. doi: 10.7554/eLife.67474 (PMC9725752; doi:10.7554/eLife.67474)
Supplement: Supplementary file 2. [file elife-67474-supp2.xlsx]

## Sheet: CV-N ICDC
			Dynamically Coupled to Binding Sites										Not Dynamically Coupled to Binding Sites
			1										0
	Coevolved with Binding Sites	1	Residue	DFI Score	DCI Score	Distance		RAPTORX Score	MISTIC Score	EVCOUPLING Score	Current Amino acid	Available Amino acid	Residue	DFI Score	DCI Score	Distance		RAPTORX Score	MISTIC Score	EVCOUPLING Score	Current Amino acid	Available Amino acid
						Minimum	Average									Minimum	Average
			34	0.17	0.71	16	22	0.65	0.93	0.71	I	FIKLMVY	18	0.54	0.51	16	21	0.65	0.98	0.84	L	FILMV
			61	0.15	0.83	11	15	0.81	0.76	0.86	T	ACFIKLMQSTVWY	66	0.95	0.27	21	26	0.27	0.91	0.94	S	ADEFGKLMNPQRST
			71	0.01	0.93	11	13	0.94	0.92	0.98	A	ACDEGQSTV
	Not Coevolved with Binding Sites	0	32	0.02	0.91	23	29	0.44	0.92	0.48	S	ACDHLNSTV	65	0.88	0.49	21	24	0.26	0.7	0.69	G	ADEFGHIKNPQRSTWY
			99	0.35	0.85	18	26	0.53	0.3	0.37	K	ADEFHIKLMNQRSTV	67	0.82	0.29	18	23	0.34	0.79	0.86	S	ADEGHIKLMNPQRSTVY
													88	0.74	0.55	16	23	0.59	0.72	0.73	D	ADEGHNRST
