# Supplementary material for: Design of novel cyanovirin-N variants by modulation of binding dynamics through distal mutations
Source: eLife. 2022 Dec 6;11:e67474. doi: 10.7554/eLife.67474 (PMC9725752; doi:10.7554/eLife.67474)
Supplement: Supplementary file 3. [file elife-67474-supp3.xlsx]

## Sheet: Binding Data
Protein	Predicted Binding Score	ITC dimannose
	(X-score energy unit)	Kd (mM)	DH (kcal/mol)	TDS (kcal/mol) (T=298K)	DG (kcal/mol)
Wild Type	-7.08	16 ± 1	-12.5 ± 0.3	-6.00 ± 0.1	-6.50 ± 0.3
mutDB	-5.97	No-binding	No-binding	No-binding	No-binding
P51G-m4	-6.62	117 ± 3	-12.3 ± 0.3	-7.00 ± 0.3	-5.30 ± 0.3
