# Supplementary material for: Design of novel cyanovirin-N variants by modulation of binding dynamics through distal mutations
Source: eLife. 2022 Dec 6;11:e67474. doi: 10.7554/eLife.67474 (PMC9725752; doi:10.7554/eLife.67474)
Supplement: Supplementary file 4. [file elife-67474-supp4.xlsx]

## Sheet: MM-PBSA
Protein	DH (kcal/mol)	TDS (kcal/mol)	DG (kcal/mol)
P51G-m4	-31.1347	-18.3362	-12.7985
I34K	-0.0301	-51.0716	51.0415
I34L	-27.5405	-17.9665	-9.574
I34Y	-29.7613	-15.7161	-14.0452
* The ΔG scores displayed in this table correlates with experimental binding scores with an R value of 0.87.
