# Supplementary material for: Design of novel cyanovirin-N variants by modulation of binding dynamics through distal mutations
Source: eLife. 2022 Dec 6;11:e67474. doi: 10.7554/eLife.67474 (PMC9725752; doi:10.7554/eLife.67474)
Supplement: Supplementary file 6. [file elife-67474-supp6.xlsx]

## Sheet: CV-N Dynamics and Evolution
Residue	DFI Score	DCI Score	Distance from Binding Sites (Å)		RAPTORX Score	MISTIC Score	EVCOUPLING Score
			Minimum	Average
1	0.98	0.72	20	27	0.69	0.3	0.38
2	0.91	0.73	18	25	0.73	0.3	0.6
3	0.86	0.58	20	27	0.72	0.3	0.61
4	0.43	0.67	21	28	0.84	0.3	0.64
5	0.8	0.36	22	28	0.84	0.3	0.28
6	0.79	0.42	25	31	0.86	0.89	0.45
7	0.66	0.59	27	33	0.85	0.88	0.29
8	0.37	0.22	25	31	0.88	0.91	0.36
9	0.52	0.14	26	31	0.81	0.9	0.64
10	0.48	0.36	26	30	0.73	0.77	0.4
11	0.41	0.35	22	26	0.75	0.75	0.58
12	0.72	0.69	20	24	0.63	0.88	0.7
13	0.67	0.68	17	21	0.69	0.85	0.89
14	0.73	0.66	16	20	0.61	0.3	0.58
15	0.58	0.76	12	17	0.69	0.85	0.65
16	0.31	0.77	12	16	0.73	0.82	0.8
17	0.44	0.62	15	19	0.65	0.94	0.9
18	0.54	0.51	16	21	0.65	0.98	0.84
19	0.33	0.8	20	25	0.56	0.79	0.81
20	0.06	0.54	22	27	0.48	0.83	0.4
21	0.1	0.44	26	31	0.38	0.85	0.82
22	0.22	0.48	26	32	0.38	0.81	0.57
23	0.76	0.62	29	35	0.38	0.92	0.85
24	0.9	0.55	30	37	0.39	0.78	0.75
25	0.97	0.52	32	39	0.39	0.94	0.84
26	1	0.4	35	42	0.35	0.77	0.75
27	0.99	0.43	35	42	0.35	0.93	0.9
28	0.94	0.5	34	40	0.32	0.92	0.91
29	0.87	0.6	31	37	0.33	0.95	0.84
30	0.7	0.55	28	34	0.28	0.75	0.82
31	0.18	0.84	26	32	0.35	0.84	0.78
32	0.02	0.91	23	29	0.44	0.92	0.48
33	0.11	0.9	19	25	0.53	0.79	0.76
34	0.17	0.71	16	22	0.65	0.93	0.71
35	0.26	0.82	13	19	0.76	0.61	0.97
36	0.27	0.76	10	16	0.9	0.98	0.98
37	0.23	0.78	8	14	0.9	0.91	0.72
38	0.59	0.79	8	16	0.87	0.69	0.67
39	0.56	0.89	7	15	0.9	0.68	0.91
40	0.09	0.99	4	12	0.94	0.93	0.95
41	0.16	1	0	9	0.92	0.6	0.61
42	0.14	1	0	7	0.96	1	0.98
43	0.57	0.97	4	8	0.92	0.8	0.88
44	0.69	0.98	6	8	0.98	0.93	0.97
45	0.47	0.93	6	8	0.96	0.99	0.99
46	0.36	0.95	5	10	0.89	0.83	0.83
47	0.19	0.99	4	10	0.99	0.94	0.92
48	0.39	0.95	5	12	0.99	0.94	0.95
49	0.45	0.91	6	14	0.98	0.85	0.91
50	0.83	0.95	5	13	0.98	0.98	0.97
51	0.81	0.92	5	13	0.93	0.99	0.91
52	0.71	0.96	5	11	0.88	0.97	0.93
53	0.4	0.92	6	11	0.91	0.81	0.96
54	0.29	0.97	5	9	0.94	0.91	0.98
55	0.2	0.96	5	11	0.9	0.8	0.98
56	0.38	0.98	4	10	0.89	0.99	0.97
57	0.42	1	0	7	0.96	1	0.98
58	0.08	0.99	4	9	0.95	0.98	0.93
59	0.34	0.95	7	12	0.84	0.74	0.75
60	0.32	0.93	11	15	0.76	0.88	0.87
61	0.15	0.83	11	15	0.81	0.76	0.86
62	0.55	0.86	15	18	0.53	0.94	0.94
63	0.63	0.7	17	20	0.52	0.84	0.91
64	0.75	0.68	18	21	0.36	0.89	0.93
65	0.88	0.49	21	24	0.26	0.7	0.69
66	0.95	0.27	21	26	0.27	0.91	0.94
67	0.82	0.29	18	23	0.34	0.79	0.86
68	0.65	0.63	16	20	0.41	0.94	0.95
69	0.49	0.79	13	17	0.7	0.96	0.82
70	0.13	0.91	13	16	0.56	0.93	0.92
71	0.01	0.93	11	13	0.94	0.92	0.98
72	0.04	0.88	9	11	0.79	0.95	0.95
73	0.03	0.94	6	8	0.99	0.83	0.79
74	0.5	0.97	5	8	0.99	0.97	0.98
75	0.77	0.97	4	8	0.97	0.98	0.99
76	0.92	1	0	8	0.93	0.62	0.95
77	0.93	0.99	4	10	0.87	0.9	0.99
78	0.89	1	0	9	0.9	0.92	0.95
79	0.84	0.99	4	10	0.77	0.93	0.98
80	0.62	0.9	7	11	0.86	1	0.97
81	0.46	0.55	10	12	0.93	0.78	0.95
82	0.25	0.81	12	13	0.91	0.79	0.95
83	0.05	0.86	9	12	0.97	0.3	0.91
84	0.12	0.89	11	14	0.87	0.86	0.83
85	0.25	0.89	11	15	0.96	0.97	0.7
86	0.53	0.69	13	19	0.76	0.71	0.64
87	0.64	0.53	13	19	0.83	0.96	0.56
88	0.74	0.55	16	23	0.59	0.72	0.73
89	0.85	0.63	15	21	0.63	0.94	0.87
90	0.61	0.71	14	22	0.72	0.74	0.73
91	0.3	0.76	15	23	0.67	0.97	0.78
92	0.24	0.84	19	26	0.62	0.97	0.83
93	0.28	0.87	22	29	0.67	0.99	0.13
94	0.68	0.87	24	32	0.64	0.3	0.78
95	0.78	0.78	27	35	0.53	0.81	0.58
96	0.6	0.73	26	33	0.58	0.98	0.18
97	0.21	0.83	23	30	0.6	0.96	0.81
98	0.07	0.84	20	27	0.75	0.97	0.33
99	0.35	0.85	18	26	0.53	0.3	0.37
100	0.51	0.75	15	23	0.86	0.3	0.55
101	0.75	0.74	16	24	0.76	0.3	0.95
